# Supplementary material
Source: PubMed Central journal article supplement (PMC6937386)
Supplement: NIHMS1046980-supplement-Supplemental_Material.pdf [file NIHMS1046980-supplement-Supplemental_Material.pdf]

## Supplemental Online Material for

“Quality or quantity? A multi-study analysis of emotion regulation skills deficits associated with Borderline Personality Disorder”

Table S1.

*Means, standard deviations, and group comparison statistics of psychopathology, emotion regulation skill frequency, and emotion regulation quality measures.*

| Variable | HC<br><i>M (SD)</i>        | MDD<br><i>M (SD)</i>       | BPD<br><i>M (SD)</i>       | BPD+MDD<br><i>M (SD)</i>  | <i>F</i> | <i>df</i> | <i>p</i> |
|----------|----------------------------|----------------------------|----------------------------|---------------------------|----------|-----------|----------|
| Study 1  | ( <i>n</i> = 149)          | ( <i>n</i> = 54)           | ( <i>n</i> = 30)           | ( <i>n</i> = 39)          |          |           |          |
| PAI-BOR  | 16.84 (10.03) <sub>a</sub> | 29.50 (6.89) <sub>b</sub>  | 44.83 (5.48) <sub>c</sub>  | 47.62 (6.81) <sub>c</sub> | 186.54   | 3, 268    | < .01    |
| PHQ-9    | 3.32 (3.60) <sub>a</sub>   | 16.11 (2.96) <sub>b</sub>  | 10.50 (3.89) <sub>c</sub>  | 18.15 (4.02) <sub>d</sub> | 282.38   | 3, 268    | < .01    |
| DSS      | 1.66 (0.58) <sub>a</sub>   | 1.55 (0.52) <sub>a,b</sub> | 1.43 (0.55) <sub>b</sub>   | 1.41 (0.60) <sub>b</sub>  | 2.93     | 3, 268    | .03      |
| DCS      | 1.07 (0.57) <sub>a</sub>   | 1.69 (0.40) <sub>b</sub>   | 1.75 (0.55) <sub>b,c</sub> | 1.99 (0.41) <sub>c</sub>  | 48.40    | 3, 268    | < .01    |
| WOR      | 3.72 (0.81) <sub>a</sub>   | 3.26 (0.67) <sub>b</sub>   | 3.09 (0.89) <sub>b,c</sub> | 2.87 (0.82) <sub>c</sub>  | 15.66    | 3, 268    | < .01    |
| Study 2  | ( <i>n</i> = 30)           | ( <i>n</i> = 30)           | ( <i>n</i> = 18)           | ( <i>n</i> = 12)          |          |           |          |
| PAI-BOR  | 14.10 (8.15) <sub>a</sub>  | 31.67 (7.94) <sub>b</sub>  | 43.39 (9.49) <sub>c</sub>  | 48.25 (5.33) <sub>c</sub> | 76.22    | 3, 86     | < .01    |
| PHQ-9    | 2.43 (3.68) <sub>a</sub>   | 15.87 (5.40) <sub>b</sub>  | 11.11 (5.08) <sub>c</sub>  | 15.58 (2.71) <sub>b</sub> | 51.09    | 3, 86     | < .01    |
| DSS      | 2.09 (0.43) <sub>a</sub>   | 1.67 (0.46) <sub>b</sub>   | 1.80 (.61) <sub>b</sub>    | 1.76 (.39) <sub>b</sub>   | 4.09     | 3, 86     | < .01    |
| DCS      | 1.06 (0.55) <sub>a</sub>   | 1.84 (0.32) <sub>b</sub>   | 1.89 (.61) <sub>b</sub>    | 1.97 (.33) <sub>b</sub>   | 20.42    | 3, 86     | < .01    |
| WOR      | 3.97 (0.82) <sub>a</sub>   | 3.16 (0.95) <sub>b</sub>   | 2.80 (1.07) <sub>b</sub>   | 3.13 (.81) <sub>b</sub>   | 7.34     | 3, 86     | < .01    |

*Note.* HC = Healthy controls. MDD = Major Depressive Disorder. BPD = Borderline Personality Disorder. PAI-BOR = Personality Assessment Inventory – Borderline subscale. PHQ-9 = Patient Health Questionnaire – 9. DSS = DBT-WCCL DBT Skills Subscale. DCS = DBT-WCCL Dysfunctional Coping Subscale. WOR = Ways of Responding scale. Different subscripts (i.e., a, b, c, d) indicate statistically significant between-group differences in mean values of that measure, *ps* < .05.

Study 1.

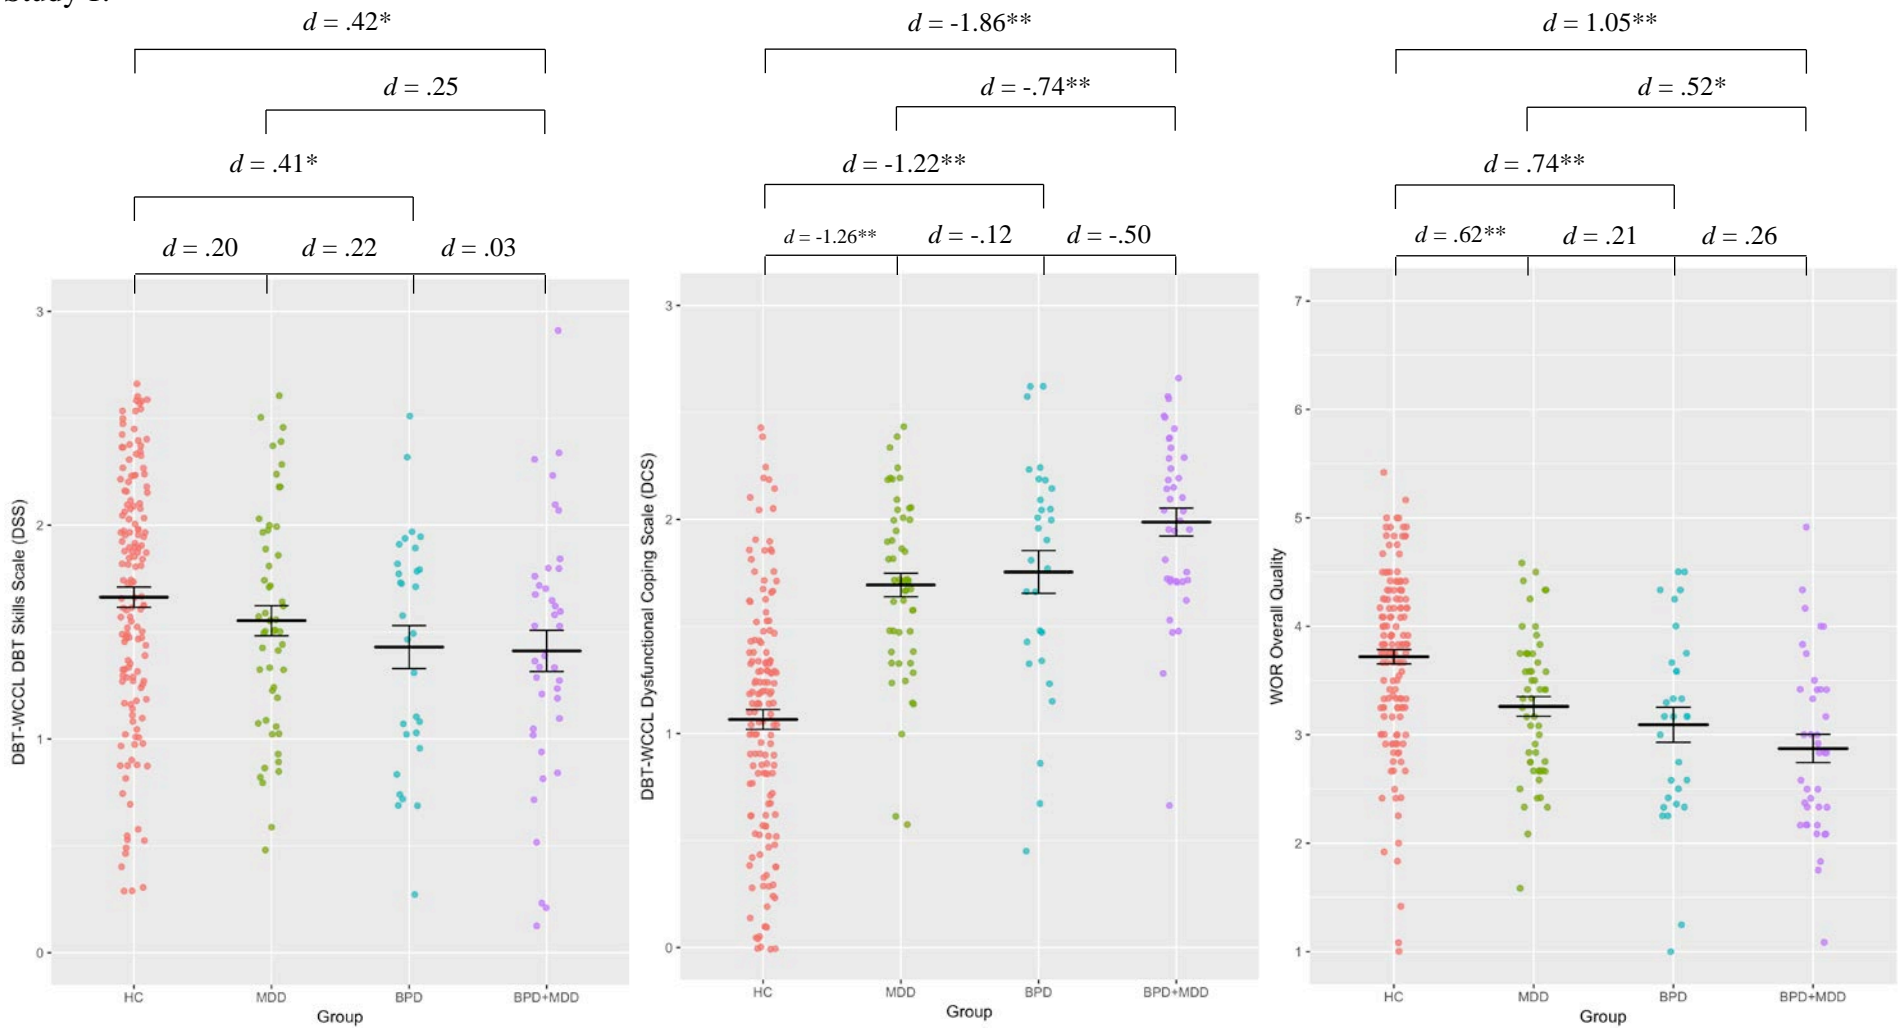

Figure S1. Study 1 emotion regulation skill frequency and quality measures by group. DBT-WCCL = DBT Ways of Coping Checklist. WOR = Ways of Responding scale. HC = healthy controls. MDD = Major Depressive Disorder. BPD = Borderline Personality Disorder. BPD+MDD = Borderline Personality Disorder and Major Depressive Disorder.  $d$  = Cohen's  $d$ . \*  $p < .05$ , \*\*  $p < .01$ .

Study 2.

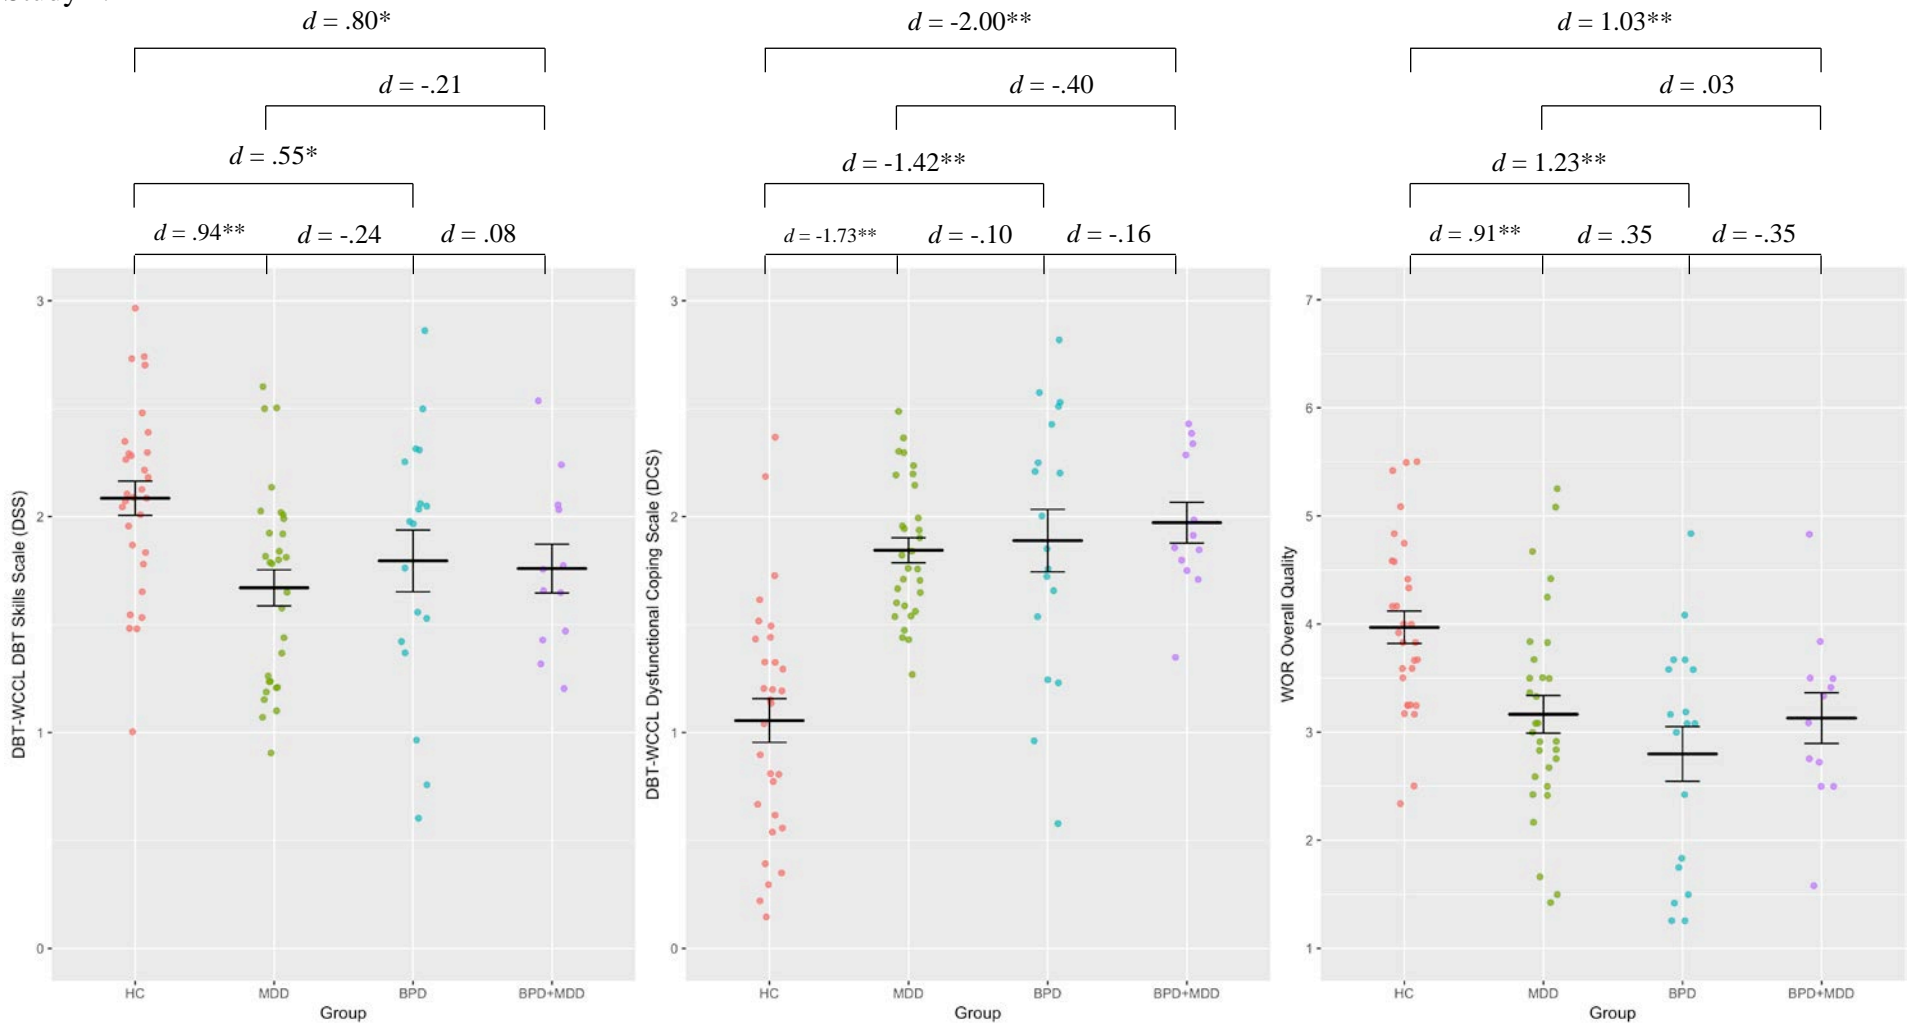

Figure S2. Study 2 emotion regulation skill frequency and quality measures by group. DBT-WCCL = DBT Ways of Coping Checklist. WOR = Ways of Responding scale. HC = healthy controls. MDD = Major Depressive Disorder. BPD = Borderline Personality Disorder. BPD+MDD = Borderline Personality Disorder and Major Depressive Disorder. *d* = Cohen's *d*. \*  $p < .05$ , \*\*  $p < .01$ .

Table S2.

*Meta-analytic effect sizes for emotion regulation measures.*

## DBT-WCCL DBT Skills Subscale

| 1   | 2       | Cohen's <i>d</i> | <i>SE</i> | <i>p</i> | 95% CI      |
|-----|---------|------------------|-----------|----------|-------------|
| HC  | MDD     | .39              | .14       | < .01    | [.12, .66]  |
| HC  | BPD     | .45              | .17       | < .01    | [.12, .78]  |
| HC  | BPD+MDD | .50              | .16       | < .01    | [.18, .82]  |
| MDD | BPD     | .05              | .18       | .78      | [-.31, .41] |
| MDD | BPD+MDD | .12              | .18       | .49      | [-.23, .48] |
| BPD | BPD+MDD | .05              | .20       | .83      | [-.35, .44] |

## DBT-WCCL Dysfunctional Coping Subscale

| 1   | 2       | Cohen's <i>d</i> | <i>SE</i> | <i>p</i> | 95% CI         |
|-----|---------|------------------|-----------|----------|----------------|
| HC  | MDD     | -1.37            | .15       | < .01    | [-1.08, -1.67] |
| HC  | BPD     | -1.28            | .18       | < .01    | [-.93, -1.63]  |
| HC  | BPD+MDD | -1.89            | .18       | < .01    | [-1.53, -2.25] |
| MDD | BPD     | -.11             | .18       | .53      | [-.47, .24]    |
| MDD | BPD+MDD | -.64             | .18       | < .01    | [-1.00, -.28]  |
| BPD | BPD+MDD | -.40             | .21       | .05      | [-.80, .01]    |

## WOR Quality

| 1   | 2       | Cohen's <i>d</i> | <i>SE</i> | <i>p</i> | 95% CI      |
|-----|---------|------------------|-----------|----------|-------------|
| HC  | MDD     | .70              | .14       | < .01    | [.42, .97]  |
| HC  | BPD     | .88              | .17       | < .01    | [.54, 1.22] |
| HC  | BPD+MDD | 1.05             | .17       | < .01    | [.72, 1.37] |
| MDD | BPD     | .26              | .18       | .15      | [-.10, .62] |
| MDD | BPD+MDD | .38              | .18       | .03      | [.03, .74]  |
| BPD | BPD+MDD | .08              | .20       | .70      | [-.32, .48] |

*Note.* Cohen's *d* calculated by subtracting the mean of group 2 from group 1. HC = healthy controls. MDD = Major Depressive Disorder. BPD = Borderline Personality Disorder. BPD+MDD = Borderline Personality Disorder and Major Depressive Disorder.

Table S3.

Associations of adaptive skills, maladaptive strategies, and strategy quality with Borderline Personality Disorder features.

| Variable               | $\beta$ | <i>SE</i> | <i>p</i> | 95% CI       |
|------------------------|---------|-----------|----------|--------------|
| Intercept              | .02     | .04       | .55      | [-.06, .10]  |
| Study                  | .10     | .08       | .25      | [-.07, .26]  |
| Adaptive skills        | -.19    | .04       | < .01    | [-.27, -.12] |
| Maladaptive strategies | .63     | .04       | < .01    | [.56, .71]   |
| Strategy quality       | -.20    | .04       | < .01    | [-.28, -.12] |

*Note.* Borderline Personality Disorder features measured with the Personality Assessment Inventory – Borderline subscale. Adaptive skills measured with the DBT-WCCL DBT Skills subscale. Maladaptive strategies measured with the DBT-WCCL Dysfunctional Coping subscale. Strategy quality measured with the Ways of Responding scale. Study coded: -.50 = Study 1, .50 = Study 2. All variables except Study are standardized ( $M = 0$ ,  $SD = 1$ ) based on the full sample to ease interpretation.

Table S4.

Associations of adaptive skills, maladaptive strategies, and strategy quality with Major Depressive Disorder symptoms.

| Variable               | $\beta$ | <i>SE</i> | <i>p</i> | 95% CI       |
|------------------------|---------|-----------|----------|--------------|
| Intercept              | .02     | .04       | .60      | [-.06, .11]  |
| Study                  | .09     | .09       | .31      | [-.09, .26]  |
| Adaptive skills        | -.19    | .04       | < .01    | [-.27, -.11] |
| Maladaptive strategies | .63     | .04       | < .01    | [.55, .71]   |
| Strategy quality       | -.14    | .04       | < .01    | [-.22, -.06] |

*Note.* Major Depressive Disorder symptoms measured with the Patient Health Questionnaire-9. Adaptive skills measured with the DBT-WCCL DBT Skills subscale. Maladaptive strategies measured with the DBT-WCCL Dysfunctional Coping subscale. Strategy quality measured with the Ways of Responding scale. Study coded: -.50 = Study 1, .50 = Study 2. All variables except Study are standardized ( $M = 0$ ,  $SD = 1$ ) based on the full sample to ease interpretation.
